# Supplementary material for: Synthesis and characterization of bis(amine)palladium(ii) carboxylate complexes as precursors of palladium nanoparticles
Source: Royal Society of Chemistry journal article supplement (doi:10.1039/d1dt00638j), 2021-01-01
Supplement: d1dt00638j1.pdf [file d1dt00638j1.pdf]

Electronic Supporting Information

## Synthesis and characterization of bis(amine)palladium(II) carboxylate complexes as precursors of palladium nanoparticles

Joanna Zakrzewska, Pawel Uznanski\*

Centre of Molecular and Macromolecular Studies Polish Academy of Sciences  
Sienkiewicza 112, 90-363 Lodz, Poland

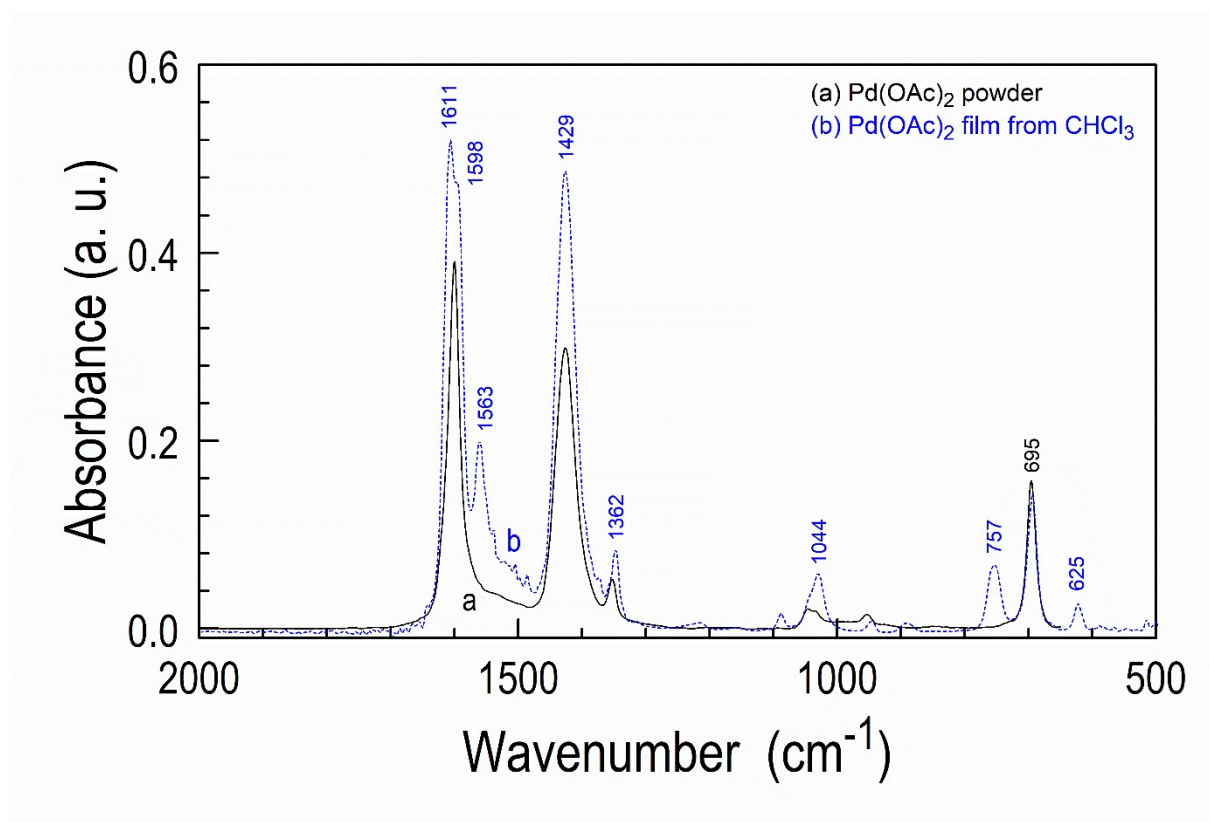

Fig. S1. FTIR spectra of PdOAc<sub>2</sub> solid samples: original powder (a), and thin film poured from CHCl<sub>3</sub> solution (b).

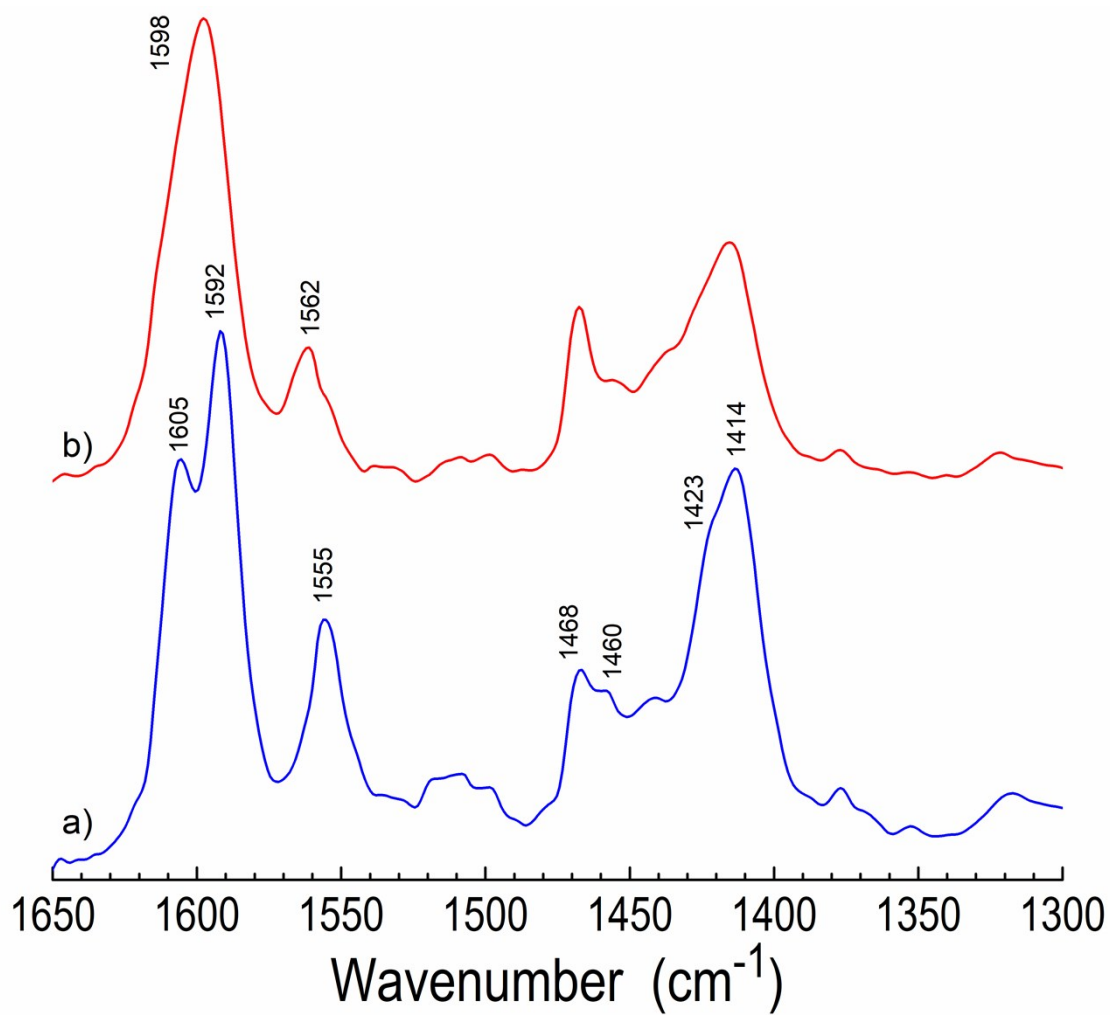

Fig. S2. FTIR spectra of PdL<sub>2</sub> in CHCl<sub>3</sub> solution, and a solid sample cast from CHCl<sub>3</sub> (b).

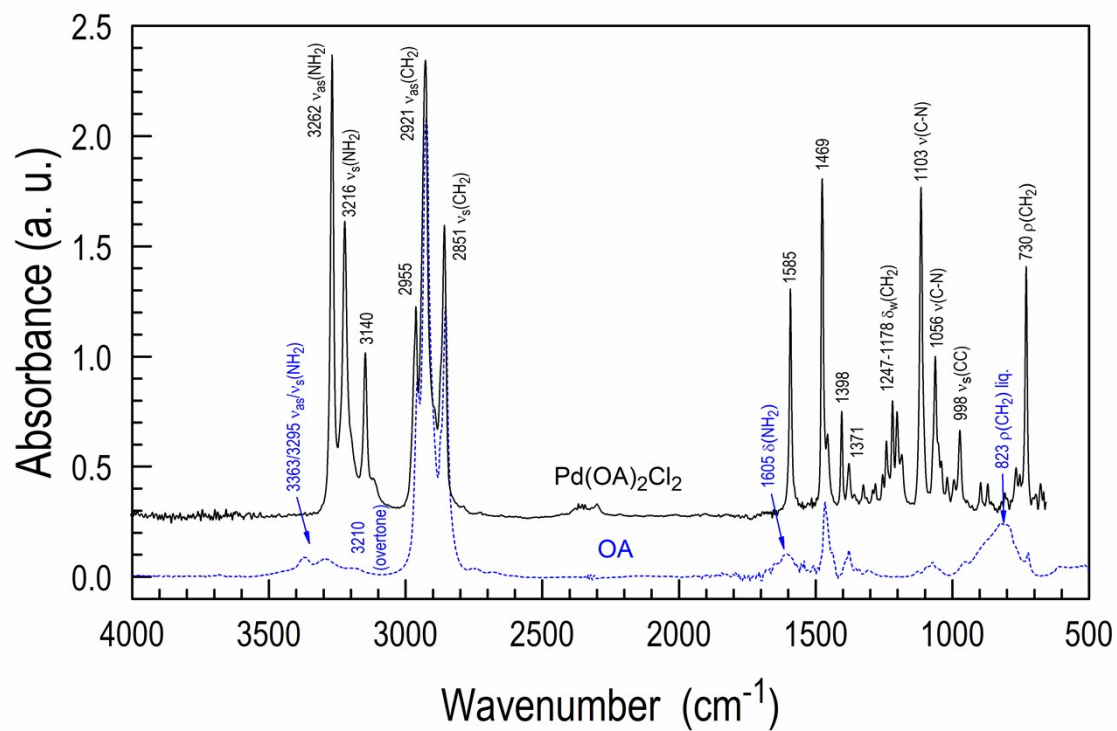

Fig. S3. FTIR spectra of n-octylamine (OA) and n-octylamine/palladium chloride complex  $[\text{PdCl}_2\text{-}2\text{OA}]$ .
